# Supplementary material for: DHCR7: from sterol biosynthesis to oncogenic role in colorectal cancer
Source: PeerJ journal article supplement (doi:10.7717/peerj.20323), 2025-11-20
Supplement: Animal_Euthanasia_Protocol.docx [file Animal_Euthanasia_Protocol.docx]

**Supplemental Files**

**Animal Euthanasia Protocol**

1. **Purpose**

With the rapid development of biomedicine, the application of laboratory animals in various disciplines and fields has become increasingly widespread, with tens of millions of laboratory animals being used for scientific research each year. Concurrently, public concern for the welfare of laboratory animals has been growing. In 2006, China's Ministry of Science and Technology issued the "Guiding Opinions on the Humane Treatment of Laboratory Animals(https://www.most.gov.cn/xxgk/xinxifenlei/fdzdgknr/fgzc/gfxwj/gfxwj2010before/201712/t20171222_137025.html)," which was the country's first comprehensive and systematic regulation on the welfare of laboratory animals. This regulation sets forth clear requirements for the breeding, production, transportation, and experimentation of laboratory animals within China. Euthanasia is a critical aspect of laboratory animal welfare and a focal point in the ethical review of animal experiments. As awareness of animal protection increases and national standards for laboratory animal welfare and ethics are promulgated and implemented, the standardization of euthanasia for laboratory animals has also garnered widespread attention.

1. **Scope**

2.1.End of Live Animal Experiments(Experimental Endpoint)

The variety of scientific experiments conducted using live animals is vast,with diverse objectives.However,a commonality among them is the necessity to implement euthanasia at the conclusion of live animal experiments.

2.2.Humane Endpoints

In animal experiments,it is often unavoidable to cause some degree of pain or distress to the animals.When the level of suffering experienced by the animals exceeds the ethical approval expectations,in accordance with principles of animal welfare and protection,appropriate methods should be employed to euthanize the animals,ensuring that their suffering is minimized.When an animal experiment has failed and further continuation will not yield meaningful results,to promptly end the animalsdistress,humane endpoints should be implemented,and the animals should be euthanized as soon as possible.

2.3.Other Reasons for Inappropriateness of Continued Husbandry

During animal experiments,considerations such as the cost and space of husbandry often necessitate the culling of animals unsuitable for experimentation.For instance,when animals need to be culled due to factors like gender,age,weight,genotype,etc.,euthanasia should also be carried out for these animals that are no longer suitable for continued care.

1. **Euthanasia Assessment Criteria**

When evaluating euthanasia methods,the following standards are applied

• Operator Safety

It is essential to ensure the safety of personnel involved.When using volatile anestheticssuch as ether,isoflurane,or halothane,it is imperative to keep away from open flames.

• Ethical Oversight

The method must be subject to the supervision of an ethical committee.

• Painless and Stress-Free induce loss of consciousness and death in experimental animals without causing pain,suffering,anxiety,or fear.

• Rapid Induction

The time required to induce loss of consciousness in experimental animals should be as short as possible.

• Safety and Reliability

Choose euthanasia methods that are safe,reliable,and preferably easy to perform.

• Irreversibility

The death process of the experimental animals must be irreversible.

• Consideration of Experimental Purposes

The chosen euthanasia method should accommodate the experimental objectives,as well as subsequent tissue evaluation,inspection,or use.

• Familiar and Safe Environment

Euthanasia should ideally be performed in an environment familiar and safe for the experimental animals.The operation must be gentle,careful,and ideally under sedation and/or anesthesia.

• Species,Age,and Health Considerations

The euthanasia method should take into account the species,age,and health status of the experimental animals.

• Avoiding Distress to Other Animals

Distressed animals may emit painful sounds,fearful behaviors,and release certainodors or pheromones that can cause anxiety and fear in other animals.Therefore,euthanasia should not be performed in the presence of conspecifics or other animals.

• Legal and Accessible Euthanasia Agents

The euthanasia drugs used must be legal,safe,reliable,readily available,and used with proper authorization.

• Equipment Maintenance

If the euthanasia method requires the assistance of instruments or equipment,it is necessary to ensure that the equipment is functioning properly.

• Verification of Death

After euthanasia and before disposing of the animals,it is mandatory to verify death.Determining whether an animal is dead involves not only observing the cessation of breathing but also checking for the absence of neurological reflexes and muscle relaxation.

• Emotional Impact on Personnel

The emotional impact of euthanasia on both observing and operating personnel must be considered.

1. **Method**

We opted for the carbon dioxide method

• Preparation Phase

Ensure all personnel are familiar with the procedure and adhere to safety protocols.

• Animal Placement

Place the experimental animals into a carbon dioxide anesthesia chamber.

• Gas Introduction

Open the carbon dioxide gas valve to allow the gas to flow into the chamber.

• Consciousness Loss

Wait for the animals to gradually lose consciousness as they are exposed to the carbon dioxide.

• Concentration Increase

Once the animals have lost consciousness,increase the carbon dioxide concentration to 100%.

• Unconsciousness Confirmation

Verify that the animals are in an unconscious state,which includes the absence of pinch reflex,muscle tone,or corneal reflexonly applicable for larger animals and rabbits.

• Final Ventilation

Continue the ventilation for an additional 2 minutes to ascertain the death of the animals.This method ensures a humane and controlled euthanasia process,minimizing distress and ensuring the ethical treatment of experimental animals.Induction at a low concentration, followed by a transition to a high concentration, results in the rapid loss of consciousness in the animal. Once the animal exhibits signs of death, the gas is continuously administered for a minimum duration of several minutes. It is imperative to confirm the animal's death prior to its removal from the euthanasia chamber. Should the animal not be deceased, immediate euthanasia is performed via cervical dislocation.

1. **Handling of surviving laboratory animals**

Upon completion of the initial research project, surviving animals may remain housed within the laboratory for potential utilization in additional colorectal cancer-related studies. During this period, we are committed to maintaining their quality of life and administering requisite medical care.
