# Supplementary material for: DHCR7: from sterol biosynthesis to oncogenic role in colorectal cancer
Source: PeerJ journal article supplement (doi:10.7717/peerj.20323), 2025-11-20
Supplement: Quantitative_PCR1.docx [file Quantitative_PCR1.docx]

**Supplementary Materials**

**Quantitative PCR Report No.1**

**1. experimental objective**

The relative expression of GAPDH and DHCR 7 was used by quantitative PCR reaction to compare the difference of DHCR 7 gene expression between carcinoma and adjacent samples, and further investigate the biological correlation of DHCR 7 and clinical samples.

**2. laboratory apparatus**

laboratory apparatus

| name | company | | | model |
| --- | --- | --- | --- | --- |
| refrigerated centrifuge | | e ppendorf | 5 424R | |
| ultramicrospectrophotometer | | Thermo | Nanodrop one | |
| Bioanalyzer | | Agilent | 2 100 | |
| PCR appearance | | Thermo Fisher | Veriti 96well | |
| Automatic pipetting workstation | | Apricot Designs | S-Pipette S2 | |
| Plate centrifuge | | C ENCE | L530 | |
| Quantitative real-time PCR instrument | | Roche | LightCycler® 480II | |

**3. Experimental reagents**

Experimental reagents

| name | company | | Art.No | |
| --- | --- | --- | --- | --- |
| And 1-bromine-3-chloropropane | | Sigma | | B9673-200ML |
| isopropanol | | SINOPHARM | | 80109218 |
| 75% Ethanol | | SINOPHARM | | 80176961 |
| Trizol | | Sigma | | T9424-100ML |
| water | | Sigma | | W4502 |
| RNase-Free DNase I | | TIANGEN | | RT411 |
| PrimeScript™ RT Master Mix (Perfect Real Time) | | TaKaRa | | RR036A |
| ChamQ Universal SYBR qPCR Master Mix | | Vazyme | | Q711-02 |
| Seal plate film | | BIO-RAD | | M SD1001 |

**4. experimental procedure**

**1. Total RNA extraction**

(1) Tissue sample: Remove the tissue sample to be ground from the liquid nitrogen or-80℃ refrigerator, cut the tissue sample into about 3 mm 3 mm 3 mm on dry ice, and place it in a 1.5mL EP tube with 1 mL Trizol lysate. After submerging the ultrafine homogenizer head in Trizol lysate for 5-10s, inactivated RNA enzyme, tissue grinding; grind for 4℃, centrifuge at 5000 rpm 3 min, discard the precipitation, absorb the supernatant into a new 1.5 mL EP tube and place it at room temperature for 10min;

Cell samples: collected, centrifuged at 2000 rpm for 5 min, supernatant, added 1 mlTrizol to cell precipitation, mixed and let at room temperature for 5 min, and then transferred to a new 1.5 ml EP tube;

(2) Add 200 μ of L 1-bromo-3-chloropropane per 1000ul Trizol, Sharp shock of the EP tube for 15s, Stand still at room temperature for 10 min; (3) 4℃, 12000 rpm, Centrifugation for 15 min; (4) absorb the upper layer to a new 1.5 mL EP tube, Add 1.5 x volume of pre-cooled isoprol alcohol, Mix well for 4℃ and stand for 20 min; (5) 4℃, 12000 rpm, After 15 min, Leave the upper ant; (6) Add 500 ul of 75% ethanol, washing precipitation; (7) 4℃, 12000 rpm, By centrifugation for 5 min, Leave most of the natars; (8) 4℃, 12000 rpm, Was centrifuged again for 1 min, Leave the clearing, Dry up at room temperature; (9) When the RNA precipitation is basically transparent, RNase-free water was added (with the added volume depending on the amount of RNA precipitation) to complete dissolution.

(10) RNA purification: 2.5ul DNase and 10ul RDD buffer were added to the dissolved RNA solution, and water was added to 100ul, repeat the above steps (1) - (9), the concentration and quality of RNA extracted were determined by Nanodrop one analysis, RNA integrity was detected by Agilent 2100 Bioanalyzer, and samples with RIN value greater than 7 for subsequent experiments.

**2.RNA reverse transcription obtains cDNA according to the Protocol of TaKaRa Company PrimeScript™ RT Master Mix (Perfect Real Time), steps as follows:**

(1) 2 μL 5X PrimeScript RT Master Mix (Perfect Real Time) and 500n g to t a l RN A were added to the PCR tube and supplemented with RN ase-F re e H2 O to 10 μ L, gently mix and then centrifuge;

(2) Reverse transcription according to 37℃ 15min (reverse transcription reaction), 85℃ 5 sec (inactivation reaction of reverse transcription enzyme), 4℃ program;

(3), the resulting RT product cDNA can be used to prepare the cDNA chips.

**3.Real-time PCR test, according to the Protocol of the ChamQ Universal SYBR qPCR Master Mix kit, the specific steps are as follows:**

(1) The sample was removed from-20℃ and placed at room temperature for 1min.

(2) The 20ul system is configured for qPCR MasterMix. The DNA template is already on the product cDNA, so 2ul DNA template is replaced with water. The following solutions are provided in the centrifuge tube:

| name | volume |
| --- | --- |
| 2 × ChamQ Universal SYBR qPCR Master Mix | 10μl |
| Forward primer( 10μM) | 0. 3μl |
| Reverse primer( 10μM) | 0. 3μl |
| ddH2 O | 9. 4μl |

1. Remove the sealing film of the sample, mix the above mixture well, and add it to the sample

(4) Seal the sample with a new sealing film, and pay attention to carefully stick tight. After sealing, the well plate was placed on ice for 15min to fully dissolve the lyophilized cDNA. After gentle shaking, be centrifuged at 2000-6000rpm for 1min;

(5) Put the well plate into the PCR instrument, set the procedure, and conduct the PCR experiment.

| Stage 1 | Predenaturationa | Reps:1 | 9 5℃ | 30 sec |
| --- | --- | --- | --- | --- |
| Stage 2 | circular reaction | Reps: 40 | 9 5℃ | 3-10 secb |
|  |  |  | 60℃ | 10-30 secc |
|  |  |  | 9 5℃ | 15 sec |
| Stage 3 | The melting curved | Reps:1 | 60℃ | 60 sec |
|  |  |  | 95℃ | 15 sec |

**Note:**

**A. The pre-denaturation condition is suitable for most amplification reactions. If the template structure is complex, the pre-denaturation time can be extended to 3 min to improve the pre-denaturation effect.**

B. Standard procedure selection 10 sec; quick procedure minimum optional 3 sec.

C. Select 30 sec by standard procedure; Quick procedure: for amplicons within 200 bp, the minimum extension time can be set to 10 sec; over 200 bp, the recommended extension time is 30 sec.

In d. Different instrument types, the melting curve acquisition procedure is different. Use the melting curve acquisition program by default.

(6) Experimental data analysis

**Primer information**

| **Target genes** | **Upstream primer sequences** | **The downstream primer sequences** | **Amplified fragment size (bp)** |
| --- | --- | --- | --- |
| DHCR7 | CAGGAAGCCCAAGGTCATC | AGCAGGCGGTAAGGCAC | 297 |

**6. Experimental results**

**result display:**

Figure 1 Expression of the DHCR 7 gene in carcinoma versus adjacent carcinoma was determined by qPCR

remarks:

① The preexperiment was tested with primers for a small sample size, the amplification curve and dissolution curve were normal, and the sequencing results were compared correctly, indicating that the primers were qualified. The expansion of the formal experimental sample size does not guarantee that the expression abundance of target genes in each sample is as high as that in the pre-experimental sample, so non-specific amplification, bimodal dissolution curve or excessive CT values due to the low abundance of the target gene may occur.

② Formal test results, in the case of normal internal reference CT value, the CT value of the target gene is between 29 and 30, indicating that the expression of the target gene is low, the instrument has some error in the reading and calculation of the CT alue, and the repeatability between holes is low;

③In the formal test results, if the CT value of the target gene was greater than 30 or undetectable, indicating that the expression of the target gene is very low, the background fluorescence is higher than that of the target gene, the instrument has some error in the calculation of the CT value, and the reproducibility between holes is low. Size comparison of the CT values for the same samples in this interval is not recommended.
