# Supplementary material for: DHCR7: from sterol biosynthesis to oncogenic role in colorectal cancer
Source: PeerJ journal article supplement (doi:10.7717/peerj.20323), 2025-11-20
Supplement: Quantitative_PCR2.docx [file Quantitative_PCR2.docx]

**Supplementary Materials**

**Quantitative PCR Report No.2**

**1. Materials and Methods**

**1.1 Primer design**

| **Gene** |  | **Sequence** |
| --- | --- | --- |
| h-ACTB | F primer | AAACGTGCTGCTGACCGAG |
| R primer | TAGCACAGCCTGGATAGCAAC |
| Size: 119bp | |
| h-DHCR7 | F primer | GCTATGCCGTCTCCACCTTC |
| R primer | TCCCGATCCGAGGGTTAAAC |
| Size: 129bp | |

**1.2 Reagents and instruments**

General reagent (Cat # GMRS-001 Gemma, Shanghai)

ABI 7500 Real-time quantitative PCR instrument

**1.3 Total RNA extraction**

1) Add 1ml Ezol lysate to the collected cell sample and mix with vortex shock.

2) Add 0.2ml of trichloromethane, shake vigorously for 10s, and leave it at room temperature for 1 minute.

3) 4℃, and centrifuged at 12,000 xg for 15 min.

4) Transfer the upper clear water phase to another new RNA enzyme-free centrifuge tube and add an equal volume of 100% ethanol.

5) Draw all the samples and add a mini-spin centrifuge column with a 2ml collecting tube.8,000 xg, centrifugation at room temperature for 15s, discard the drain.

6) Transfer the remaining samples to the centrifugal column and repeat step 5.

7) Add 700 μ l WB to the centrifugal column, gently cover the lid, 8,000 xg, centrifuge at room temperature for 15s, discard and drain the liquid.

8) Repeat step 7 and wash the centrifuge column twice with 500 μ l WB.

9) The centrifugal column was transferred to a new 1.5ml centrifuge tube without RNA enzyme, dropping 50 μl DEPC water to the center of the silicone film, and the RNA was eluted by centrifugation at 4℃ and 1 0,000 x g for 3 min.

**1.4 fluorescence quantitative PCR**

**1) Reverse recording reaction system**

| **component** | **final concentration** | **dosage** |
| --- | --- | --- |
| 2 Reverse transcription buffer | 2× | 10 μl |
| Reverse recording primer (1 uM) | 50 n M | 1.2 μl |
| overall RNA | — | X μl* |
| MMLV reverse transcriptase (200 U / μ l) | 2 U/μl | 0.2 μl |
| DEPC water |  | To 20 μl |

Note: * To normalize the amount of template, the volume of X was calculated from the OD measurement of each sample, see RNA Extraction Quality Test.

**2) Reverse recording program**

42ºC 30 min; 85 ºC10 min.

**3) Real-time quantitative reaction system**

| **component** | **final concentration** | **dosage** |
| --- | --- | --- |
| 2 for the quantification of PCR Master Mix | 1× | 10μl |
| Upstream primer set (20 uM) | 0.08μM | 0. 08μl |
| Downstream primer set (20 uM) | 0. 08μM | 0. 08μl |
| cDNA templet | — | 2μl |
| Taq DNA Polymerase (2.5 U / μ l) | 0. 05 U/μl | 0. 4μl |
| dd H2 O |  | Add to 20 μ l |

**4) Quantitative fluorescence PCR reaction procedure**

95 C, with a 3-min denaturation session

95 C, 12 seconds; 62 C, 40 seconds. 40 recurrence

**2. Results**

**2.1 RNA extraction quality testing**

| **Sample ID** | | **Sample Type** | **260/280** | **Concentration(ng/ul)** |
| --- | --- | --- | --- | --- |
| 1 | LV3NC | RNA | 2.12 | 701.296 |
| 2 | DHCR7-Homo-288 | RNA | 2.14 | 650.828 |
| 3 | DHCR7-Homo-821 | RNA | 2.14 | 684.71 |
| 4 | DHCR7-Homo-962 | RNA | 2.14 | 486.477 |
| 5 | DHCR7-Homo-1064 | RNA | 2.1 | 572.452 |

**
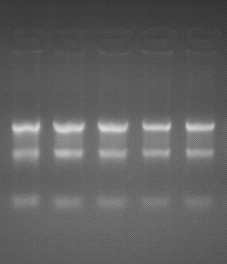
**

**1 2 3 4 5**

1. The 28s rRNA and 18s rRNA bands were clearly visible by sample RNA electrophoresis, indicating that the RNA is not degraded;

2. Quality determination criteria:

A. Sample OD measurement A260 / A280 is between 1.9 and 2.1, with no contamination during the extraction process and the best quality;

B. The OD value of the sample A260 / A280 is between 1.8 and 1.9, and trace contamination may occur during the extraction process, which is within the acceptable range of the experiment;

C. Sample OD determination of A260 / A280 was less than 1.8, and protein or organic reagent phenol residues remained during the extraction.

**2.2 Amplification curve**


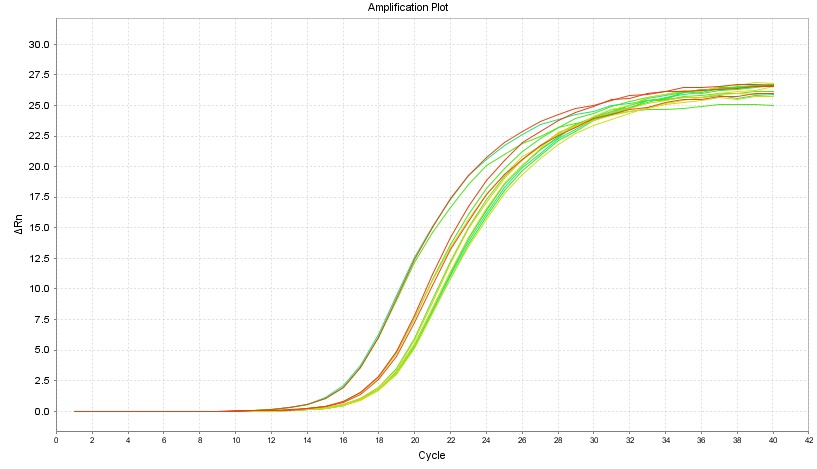

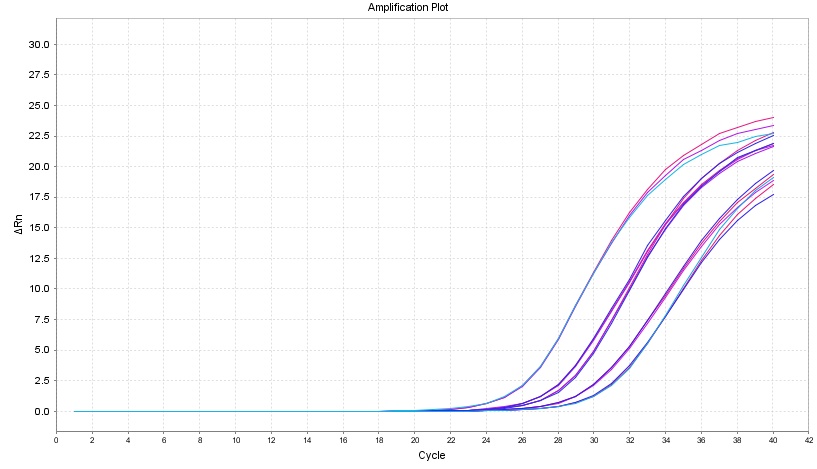


Figure 1. h-ACTB / h / DHCR7 amplification curve

**The 2.3 SYBR Green melting curve**


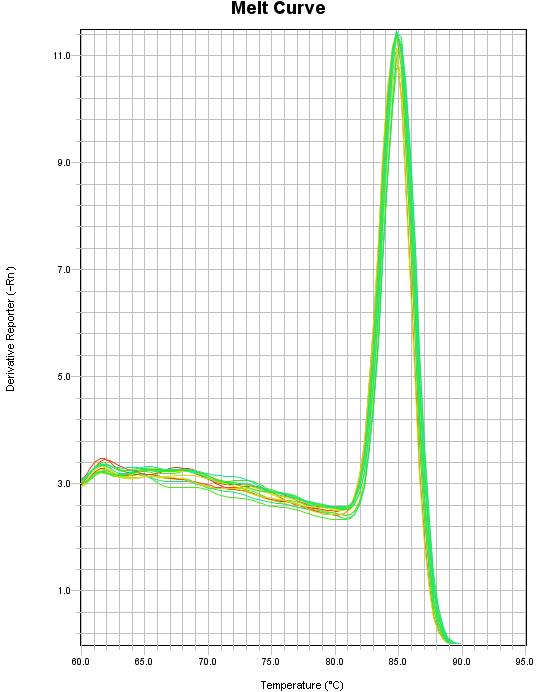

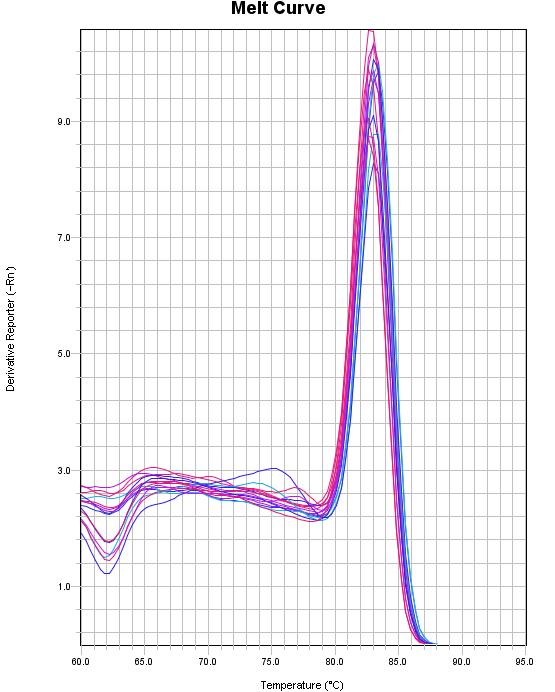


Figure 1. h-ACTB / h-DHCR7 melting curve

**2.4 Bar chart analysis**

|  | LV3NC | DHCR7-Homo  -288 | DHCR7-Homo  -821 | DHCR7-Homo  -962 | DHCR7-Homo  -1064 |
| --- | --- | --- | --- | --- | --- |
| Repeat1 | 0.7701131 | 1.474995862 | 1.11200843 | 0.2310325 | 0.4248041 |
| Repeat2 | 1.1411126 | 1.562055776 | 1.0998074 | 0.2193595 | 0.4439521 |
| Repeat3 | 1.1379338 | 1.546236813 | 1.15701322 | 0.2161122 | 0.4377861 |
| Mean | 1.00  (0.71~1.42) | 1.53  (1.19~1.96) | 1.12  (0.87~1.44) | 0.22  (0.17~0.29) | 0.44  (0.34~0.56) |

Figure 1. LV3NC as the calibrated h-ACTB as the internal reference h-DHCR 7 gene expression level

**2.5, electrophoregram**


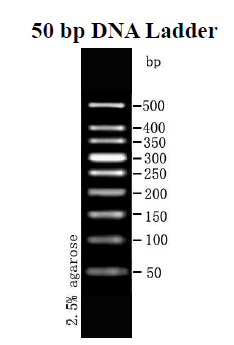

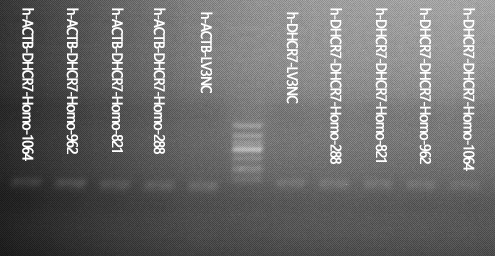


[conclusion]

Electrophoresis showed that the PCR products were of correct size and the absence of the mixed band indicated no specific amplification.

**2.6 Raw data and relative quantitative calculations**

|  | LV3NC | |
| --- | --- | --- |
| h-ACTB | h-DHCR7 |
| Repeat1 | 18.35 | 28.97 |
| Repeat2 | 18.99 | 28.90 |
| Repeat3 | 18.93 | 28.91 |
| Mean CT | 18.76±0.35 | 28.93±0.04 |
|  CT | — | 10.17±0.36 |
|  CT | — | 0.00±0.50 |
| 2-CT | — | **1.00(0.71~1.42)** |

|  | DHCR7-Homo-288 | |
| --- | --- | --- |
| h-ACTB | h-DHCR7 |
| Repeat1 | 16.97 | 26.48 |
| Repeat2 | 16.96 | 26.51 |
| Repeat3 | 16.87 | 26.49 |
| Mean CT | 16.93±0.06 | 26.49±0.02 |
|  CT | — | 9.56±0.06 |
|  CT | — | -0.61±0.36 |
| 2-CT | — | **1.53(1.19~1.96)** |

|  | DHCR7-Homo-821 | |
| --- | --- | --- |
| h-ACTB | h-DHCR7 |
| Repeat1 | 18.50 | 28.43 |
| Repeat2 | 18.39 | 28.46 |
| Repeat3 | 18.39 | 28.41 |
| Mean CT | 18.43±0.06 | 28.43±0.03 |
|  CT | — | 10±0.07 |
|  CT | — | -0.17±0.36 |
| 2-CT | — | **1.12(0.87~1.44)** |

|  | DHCR7-Homo-962 | |
| --- | --- | --- |
| h-ACTB | h-DHCR7 |
| Repeat1 | 19.11 | 31.52 |
| Repeat2 | 19.11 | 31.39 |
| Repeat3 | 19.14 | 31.47 |
| Mean CT | 19.12±0.02 | 31.46±0.06 |
|  CT | — | 12.34±0.07 |
|  CT | — | 2.17±0.36 |
| 2-CT | — | **0.22(0.17~0.29)** |

|  | DHCR7-Homo-1064 | |
| --- | --- | --- |
| h-ACTB | h-DHCR7 |
| Repeat1 | 19.21 | 30.50 |
| Repeat2 | 19.16 | 30.58 |
| Repeat3 | 19.08 | 30.49 |
| Mean CT | 19.15±0.07 | 30.52±0.05 |
|  CT | — | 11.37±0.08 |
|  CT | — | 1.20±0.37 |
| 2-CT | — | **0.44(0.34~0.56)** |

**Attached: relative quantitative calculation**

**give an example:**

|  | **sample** | |
| --- | --- | --- |
| **The reference gene** | **Target gene** |
| Repeat 1 | 8.59 | 22.35 |
| Repeat 2 | 8.85 | 22.50 |
| Repeat 3 | 9.10 | 22.58 |
| average CT | 8.85±0.26 | 22.48±0.12 |
| ΔCT | — | 13.63±0.28 |

**1. " The average of the CT "represents the mean of the three replicate Ct, and the number after" ± " indicates the standard deviation standard deviation (SD) of the three replicate Ct, and the SD is calculated as follows**


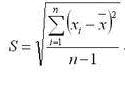


1. **ΔCT represents the difference between the average Ct value of the target gene and the reference gene in the same sample, calculated as follows:**

**microRNA/gene CΔT= the target average, CT-internal reference mean CT=22.48-8.85=13.63**

1. **ΔΔCT represents the difference sample and test sample of the calibration sample Ct for a specific target gene, calculated as follows:Δ**

|  | **Samples to be inspected** | | **calibration sample** | |
| --- | --- | --- | --- | --- |
| **The reference gene** | **Target gene** | **The reference gene** | **Target gene** |
| Repeat 1 | 8.59 | 22.35 | 8.50 | 21.92 |
| Repeat 2 | 8.85 | 22.50 | 8.72 | 22.09 |
| Repeat 3 | 9.10 | 22.58 | 9.00 | 22.37 |
| Mean CT | 8.85±0.26 | 22.48±0.12 | 8.74±0.25 | 22.13±0.23 |
| ΔCT | — | 13.63±0.28 | — | 13.39±0.34 |
| ΔΔCT | — | 0.24±0.44 | — | 0.00±0.48 |
| 2-ΔΔCT | — | **0.85(0.62~1.15)** | — | **1.00(0.72~1.39)** |

***pay attention to:CΔΔFor T calculation, the value of after "±" is defined as S4, S 4 = Sqr (S32+S02). In this formula, the " S3 indicates the sample C to be testedΔThe SD value of T, " S0 indicates the calibration sample CΔThe SD value of the T. is shown.***

1. **Finally, 2-ΔΔBoth CT and parentheses are derived from CT values, with red markers indicating low relative calibration sample expression, and opposite blue markers indicating high relative calibration expression.ΔΔ**
