# Supplementary material for: DHCR7: from sterol biosynthesis to oncogenic role in colorectal cancer
Source: PeerJ journal article supplement (doi:10.7717/peerj.20323), 2025-11-20
Supplement: raw_data.zip [file Local Patient Survival and Subgrouping.xlsx]

## Sheet: Sheet1
ID	status	time（month）	DHCR7
1	0	29	High expression
2	0	48	High expression
3	0	24	Low expression
4	0	35	Low expression
5	1	35	Low expression
6	1	23	High expression
7	1	34	High expression
8	0	36	Low expression
9	0	31	Low expression
10	0	48	High expression
11	1	33	High expression
12	0	47	Low expression
13	1	23	High expression
14	0	18	High expression
15	1	17	Low expression
16	1	9	High expression
17	0	37	High expression
18	0	29	Low expression
19	1	23	High expression
20	0	34	High expression
21	0	32	Low expression
22	1	15	High expression
23	0	23	Low expression
24	0	28	High expression
25	1	30	Low expression
26	0	36	High expression
27	0	22	High expression
28	0	35	Low expression
29	0	35	Low expression
30	0	32	Low expression
31	1	23	Low expression
32	1	33	High expression
33	0	34	Low expression
34	0	36	High expression
35	0	32	High expression
36	0	24	Low expression
37	0	23	Low expression
38	1	24	High expression
39	1	17	Low expression
40	1	32	High expression
41	1	39	High expression
42	0	34	Low expression
43	1	18	High expression
44	0	22	Low expression
45	1	30	High expression
46	1	29	High expression
47	1	35	Low expression
48	0	48	Low expression
49	1	36	High expression
50	1	30	High expression
51	0	23	Low expression
52	0	32	Low expression
53	0	28	High expression
54	0	48	High expression
55	1	23	High expression
56	1	17	High expression
57	0	22	Low expression
58	0	28	Low expression
59	0	48	Low expression
60	0	36	High expression
61	0	30	High expression
62	1	36	High expression
63	1	35	High expression
64	1	33	Low expression
65	0	33	High expression
66	0	33	Low expression
67	1	17	High expression
68	1	33	High expression
69	1	19	High expression
70	0	33	Low expression
71	1	35	High expression
72	0	24	Low expression
73	0	34	High expression
74	0	17	High expression
75	0	48	Low expression
76	0	28	High expression
77	1	48	High expression
78	0	48	Low expression
79	1	33	High expression
80	1	33	Low expression
81	1	27	High expression
82	1	34	High expression
83	1	12	High expression
84	0	29	Low expression
85	1	36	High expression
86	0	34	High expression
87	0	24	High expression
88	1	23	Low expression
89	0	34	High expression
90	1	28	High expression
91	0	13	High expression
92	1	48	High expression
93	0	32	Low expression
94	1	10	High expression
95	0	17	Low expression
96	1	36	Low expression
97	0	23	Low expression
98	1	28	Low expression
99	0	21	High expression
100	0	48	Low expression
numeric symbol	1	Tumor progression-related events have occurred
numeric symbol	0	No events associated with tumor progression
