# Supplementary material for: DHCR7: from sterol biosynthesis to oncogenic role in colorectal cancer
Source: PeerJ journal article supplement (doi:10.7717/peerj.20323), 2025-11-20
Supplement: raw_data.zip [file Microarray Patient Survival.xlsx]

## Sheet: Sheet1
ID	status	time(month)	DHCR7
0	0	77	High expression
1	1	22	High expression
2	1	47	High expression
3	0	76	High expression
4	0	75	High expression
5	1	2	High expression
6	1	0.37	High expression
7	0	75	High expression
8	1	19	High expression
9	0	74	High expression
10	0	74	High expression
11	1	51	High expression
12	1	1	High expression
13	0	69	Low expression
14	0	68	High expression
15	0	68	Low expression
16	0	68	Low expression
17	0	67	Low expression
18	0	66	Low expression
19	0	66	Low expression
20	0	66	Low expression
21	0	66	High expression
22	0	66	High expression
23	1	9	Low expression
24	0	65	Low expression
25	1	9	High expression
26	0	64	Low expression
27	1	18	High expression
28	1	10	High expression
29	0	64	Low expression
30	0	63	Low expression
31	1	28	Low expression
32	0	63	Low expression
33	0	62	Low expression
34	0	61	High expression
35	0	61	Low expression
36	0	61	Low expression
37	1	28	Low expression
38	0	61	Low expression
39	1	25	High expression
40	0	60	Low expression
41	0	60	Low expression
42	0	60	Low expression
43	0	60	High expression
44	0	60	Low expression
45	0	59	Low expression
46	0	59	High expression
47	0	59	Low expression
48	0	59	Low expression
49	0	59	Low expression
50	1	40	Low expression
51	1	31	High expression
52	1	29	High expression
53	0	55	Low expression
54	0	55	High expression
55	0	54	Low expression
56	0	54	High expression
57	1	10	Low expression
58	0	53	High expression
59	1	11	High expression
60	1	17	Low expression
61	1	8	Low expression
62	0	53	Low expression
63	0	52	Low expression
64	0	52	High expression
65	0	52	High expression
66	1	26	Low expression
67	0	52	High expression
68	0	52	High expression
69	0	52	Low expression
70	0	51	Low expression
71	0	51	Low expression
72	0	51	High expression
73	0	51	Low expression
74	1	13	High expression
75	0	51	Low expression
76	0	51	Low expression
77	1	24	Low expression
78	0	50	High expression
79	0	50	High expression
80	0	49	Low expression
81	0	49	Low expression
82	0	48	Low expression
83	0	47	High expression
84	0	47	Low expression
85	1	10	High expression
86	1	23	High expression
87	0	76	High expression
88	0	70	High expression
89	0	64	Low expression
90	0	54	Low expression
91	1	14	Low expression
92	1	4	High expression
93	1	2	High expression
symbol	1	Tumor progression-related events have occurred
symbol	0	No events associated with tumor progression
