# Supplementary material for: DHCR7: from sterol biosynthesis to oncogenic role in colorectal cancer
Source: PeerJ journal article supplement (doi:10.7717/peerj.20323), 2025-11-20
Supplement: raw_data.zip [file small molecule sterol levels in post-surgical tissues reveal significantly elevated levels in tumor tissues.xlsx]

## Sheet: Sheet1
pmol/mg	1A03	1A04	1A05	1A06
	7-Dehydrocholesterol	DESMOSTEROL	Cholesterol	Lathosterol
paraneoplastic tissue NO.1	16.7766	7.6659	16780.7	17.8296
paraneoplastic tissue NO.2	35.5046	1.02491	7446.48	10.7036
paraneoplastic tissue NO.3	30.6864	2.72552	10511.5	10.9363
paraneoplastic tissue NO.4	49.1516	1.78798	8254.49	7.5765
paraneoplastic tissue NO.5	14.3999	3.6687	7194.97	13.6289
tumor tissue NO.1	41.1957	7.64673	19397.1	16.4661
tumor tissue NO.2	59.4636	9.63128	17677.9	123.618
tumor tissue NO.3	51.455	6.91853	17423	51.2012
tumor tissue NO.4	58.8254	15.9027	18563.8	5.79194
tumor tissue NO.5	69.8002	6.39432	17964.7	36.3547
