# Supplementary material for: DHCR7: from sterol biosynthesis to oncogenic role in colorectal cancer
Source: PeerJ journal article supplement (doi:10.7717/peerj.20323), 2025-11-20
Supplement: raw_data.zip [file Tissue microarray, survival colon cancer HColA180Su21 Detailed pathology information Add PDL1 and PD1 and CD8 Add point mutation information_1_12_translate_20241217153817.pdf › Tissue microarray, survival colon cancer HColA180Su21 Detailed pathology information Add PDL1 and PD1 and CD8 Add point mutation information_1_12_translate_20241217153817.pdf]

| pattern of organization | date of surgery | survival condition | Follow-up time | Survival period 201807 | explain | Organization coding | Tumor surgical organs |
|-------------------------|-----------------|--------------------|----------------|------------------------|---------|---------------------|-----------------------|
| Next to cancer / cancer | 2012/2/24       | subsist            | 2018/7/31      | 77                     |         | D15A5131            | colon                 |
| Next to cancer / cancer | 2012/2/27       | die                | 2013/12/22     | 22                     |         | D15A5133            | colon                 |
| Next to cancer / cancer | 2012/3/22       | die                | 2016/2/11      | 47                     |         | D15A5139            | colon                 |
| Next to cancer / cancer | 2012/3/28       | subsist            | 2018/7/31      | 76                     |         | D15A5173            | colon                 |
| Next to cancer / cancer | 2012/4/3        | subsist            | 2018/7/31      | 75                     |         | D15A5144            | colon                 |
| Next to cancer / cancer | 2012/4/5        | die                | 2012/6/8       | 2                      |         | D15A5146            | colon                 |
| Next to cancer / cancer | 2012/4/6        | die                | 2012/4/17      | 0.37                   |         | D15A5147            | colon                 |
| Next to cancer / cancer | 2012/4/23       | subsist            | 2018/7/31      | 75                     |         | D15A5157            | colon                 |
| Next to cancer / cancer | 2012/5/10       | die                | 2013/12/15     | 19                     |         | D15A5150            | colon                 |
| Next to cancer / cancer | 2012/5/15       | subsist            | 2018/7/31      | 74                     |         | D15A5151            | colon                 |
| Next to cancer / cancer | 2012/5/21       | subsist            | 2018/7/31      | 74                     |         | D15A5152            | colon                 |
| Next to cancer / cancer | 2012/8/10       | die                | 2016/11/23     | 51                     |         | D15A5169            | colon                 |
| Next to cancer / cancer | 2012/8/18       | die                | 2012/9/7       | 1                      |         | D15A6034            | colon                 |
| Next to cancer / cancer | 2012/10/25      | subsist            | 2018/7/31      | 69                     |         | D15A5848            | colon                 |
| Next to cancer / cancer | 2012/11/6       | subsist            | 2018/7/31      | 68                     |         | D15A5790            | colon                 |
| Next to cancer / cancer | 2012/11/21      | subsist            | 2018/7/31      | 68                     |         | D15A5793            | colon                 |
| Next to cancer / cancer | 2012/11/7       | subsist            | 2018/7/31      | 68                     |         | D15A5797            | colon                 |
| Next to cancer / cancer | 2012/12/11      | subsist            | 2018/7/31      | 67                     |         | D15A5794            | colon                 |
| Next to cancer / cancer | 2013/1/3        | subsist            | 2018/7/31      | 66                     |         | D15A5795            | colon                 |
| Next to cancer / cancer | 2013/1/7        | subsist            | 2018/7/31      | 66                     |         | D15A5796            | colon                 |
| Next to cancer / cancer | 2013/1/14       | subsist            | 2018/7/31      | 66                     |         | D15A5792            | colon                 |
| Next to cancer / cancer | 2013/1/21       | subsist            | 2018/7/31      | 66                     |         | D15A5875            | colon                 |
| Next to cancer /        | 2013/1/22       | subsist            | 2018/7/31      | 66                     |         | D15A5800            | colon                 |

|                         |           |         |            |    |          |       |
|-------------------------|-----------|---------|------------|----|----------|-------|
| cancer                  |           |         |            |    |          |       |
| Next to cancer / cancer | 2013/1/31 | die     | 2013/10/24 | 9  | D15A5851 | colon |
| Next to cancer / cancer | 2013/2/17 | subsist | 2018/7/31  | 65 | D15A5876 | colon |
| Next to cancer / cancer | 2013/2/17 | die     | 2013/11/17 | 9  | D15A5877 | colon |
| Next to cancer / cancer | 2013/3/13 | subsist | 2018/7/31  | 64 | D15A5878 | colon |
| Next to cancer / cancer | 2013/3/15 | die     | 2014/9/20  | 18 | D15A5879 | colon |
| Next to cancer / cancer | 2013/3/20 | die     | 2014/1/6   | 10 | D15A5880 | colon |
| Next to cancer / cancer | 2013/3/22 | subsist | 2018/7/31  | 64 | D15A5802 | colon |
| Next to cancer / cancer | 2013/4/2  | subsist | 2018/7/31  | 63 | D15A5803 | colon |
| Next to cancer / cancer | 2013/4/10 | die     | 2015/8/27  | 28 | D15A5804 | colon |
| Next to cancer / cancer | 2013/4/16 | subsist | 2018/7/31  | 63 | D15A5805 | colon |
| Next to cancer / cancer | 2013/5/21 | subsist | 2018/7/31  | 62 | D15A5806 | colon |
| Next to cancer / cancer | 2013/6/3  | subsist | 2018/7/31  | 61 | D15A5808 | colon |
| Next to cancer / cancer | 2013/6/7  | subsist | 2018/7/31  | 61 | D15A5882 | colon |
| Next to cancer / cancer | 2013/6/11 | subsist | 2018/7/31  | 61 | D15A5809 | colon |
| Next to cancer / cancer | 2013/6/14 | die     | 2015/10/4  | 28 | D15A5852 | colon |
| Next to cancer / cancer | 2013/6/26 | subsist | 2018/7/31  | 61 | D15A5883 | colon |
| Next to cancer / cancer | 2013/7/10 | die     | 2015/8/15  | 25 | D15A5810 | colon |
| Next to cancer / cancer | 2013/7/11 | subsist | 2018/7/31  | 60 | D15A5811 | colon |
| Next to cancer / cancer | 2013/7/16 | subsist | 2018/7/31  | 60 | D15A5812 | colon |
| Next to cancer / cancer | 2013/7/24 | subsist | 2018/7/31  | 60 | D15A5813 | colon |
| Next to cancer / cancer | 2013/7/25 | subsist | 2018/7/31  | 60 | D15A5884 | colon |
| Next to cancer / cancer | 2013/7/30 | subsist | 2018/7/31  | 60 | D15A5814 | colon |
| Next to cancer / cancer | 2013/8/7  | subsist | 2018/7/31  | 59 | D15A5816 | colon |
| Next to cancer / cancer | 2013/8/15 | subsist | 2018/7/31  | 59 | D15A5815 | colon |

|                               |            |         |            |    |          |       |
|-------------------------------|------------|---------|------------|----|----------|-------|
| cancer                        |            |         |            |    |          |       |
| Next to<br>cancer /<br>cancer | 2013/8/16  | subsist | 2018/7/31  | 59 | D15A5885 | colon |
| Next to<br>cancer /<br>cancer | 2013/8/21  | subsist | 2018/7/31  | 59 | D15A5817 | colon |
| Next to<br>cancer /<br>cancer | 2013/8/22  | subsist | 2018/7/31  | 59 | D15A5818 | colon |
| Next to<br>cancer /<br>cancer | 2013/8/29  | die     | 2016/12/13 | 40 | D15A5819 | colon |
| Next to<br>cancer /<br>cancer | 2013/8/29  | die     | 2016/3/13  | 31 | D15A5820 | colon |
| Next to<br>cancer /<br>cancer | 2013/11/28 | die     | 2016/4/26  | 29 | D15A6202 | colon |
| Next to<br>cancer /<br>cancer | 2013/12/24 | subsist | 2018/7/31  | 55 | D15A6191 | colon |
| Next to<br>cancer /<br>cancer | 2013/12/24 | subsist | 2018/7/31  | 55 | D15A6192 | colon |
| Next to<br>cancer /<br>cancer | 2014/1/8   | subsist | 2018/7/31  | 54 | D15A6194 | colon |

|                         |           |         |            |    |          |       |
|-------------------------|-----------|---------|------------|----|----------|-------|
| Next to cancer / cancer | 2014/1/15 | subsist | 2018/7/31  | 54 | D15A6197 | colon |
| Next to cancer / cancer | 2014/1/28 | die     | 2014/11/28 | 10 | D15A6198 | colon |
| Next to cancer / cancer | 2014/2/8  | subsist | 2018/7/31  | 53 | D15A6199 | colon |
| Next to cancer / cancer | 2014/2/13 | die     | 2015/1/28  | 11 | D15A6201 | colon |
| Next to cancer / cancer | 2014/2/13 | die     | 2015/7/26  | 17 | D15A6204 | colon |
| Next to cancer / cancer | 2014/2/24 | die     | 2014/10/29 | 8  | D15A6205 | colon |
| Next to cancer / cancer | 2014/2/24 | subsist | 2018/7/31  | 53 | D15A6206 | colon |
| Next to cancer / cancer | 2014/3/6  | subsist | 2018/7/31  | 52 | D15A6207 | colon |
| Next to cancer / cancer | 2014/3/7  | subsist | 2018/7/31  | 52 | D15A6208 | colon |
| Next to cancer / cancer | 2014/3/12 | subsist | 2018/7/31  | 52 | D15A6209 | colon |
| Next to cancer / cancer | 2014/3/17 | die     | 2016/5/12  | 26 | D15A6210 | colon |
| Next to cancer / cancer | 2014/3/17 | subsist | 2018/7/31  | 52 | D15A6211 | colon |
| Next to cancer / cancer | 2014/3/28 | subsist | 2018/7/31  | 52 | D15A6212 | colon |
| Next to cancer / cancer | 2014/3/28 | subsist | 2018/7/31  | 52 | D15A6213 | colon |
| Next to cancer / cancer | 2014/4/1  | subsist | 2018/7/31  | 51 | D15A6214 | colon |
| Next to cancer / cancer | 2014/4/3  | subsist | 2018/7/31  | 51 | D15A6217 | colon |
| Next to cancer / cancer | 2014/4/8  | subsist | 2018/7/31  | 51 | D15A6218 | colon |
| Next to cancer / cancer | 2014/4/11 | subsist | 2018/7/31  | 51 | D15A6219 | colon |
| Next to cancer / cancer | 2014/4/14 | die     | 2015/5/24  | 13 | D15A6220 | colon |
| Next to cancer / cancer | 2014/4/22 | subsist | 2018/7/31  | 51 | D15A6221 | colon |
| Next to cancer / cancer | 2014/4/25 | subsist | 2018/7/31  | 51 | D15A6222 | colon |
| Next to cancer / cancer | 2014/5/6  | die     | 2016/5/12  | 24 | D15A6224 | colon |
| Next to cancer / cancer | 2014/5/27 | subsist | 2018/7/31  | 50 | D15A6228 | colon |
| Next to cancer / cancer | 2014/5/28 | subsist | 2018/7/31  | 50 | D15A6229 | colon |

|                         |           |         |            |    |          |       |
|-------------------------|-----------|---------|------------|----|----------|-------|
| Next to cancer / cancer | 2014/6/3  | subsist | 2018/7/31  | 49 | D15A6230 | colon |
| Next to cancer / cancer | 2014/6/10 | subsist | 2018/7/31  | 49 | D15A6231 | colon |
| Next to cancer / cancer | 2014/7/31 | subsist | 2018/7/31  | 48 | D15A6247 | colon |
| Next to cancer / cancer | 2014/8/13 | subsist | 2018/7/31  | 47 | D15A6248 | colon |
| Next to cancer / cancer | 2014/8/15 | subsist | 2018/7/31  | 47 | D15A6249 | colon |
| Next to cancer / cancer | 2014/8/29 | die     | 2015/6/23  | 10 | D15A6252 | colon |
| To cancer               | 2012/3/26 | die     | 2014/2/17  | 23 | D15A5140 | colon |
| To cancer               | 2012/3/27 | subsist | 2018/7/31  | 76 | D15A5141 | colon |
| To cancer               | 2012/9/28 | subsist | 2018/7/31  | 70 | D15A5874 | colon |
| To cancer               | 2013/3/25 | subsist | 2018/7/31  | 64 | D15A5801 | colon |
| To cancer               | 2014/1/15 | subsist | 2018/7/31  | 54 | D15A6195 | colon |
| To cancer               | 2014/2/11 | die     | 2015/4/27  | 14 | D15A6200 | colon |
| To cancer               | 2014/9/2  | die     | 2015/1/23  | 4  | D15A6253 | colon |
| To cancer               | 2014/9/4  | die     | 2014/11/15 | 2  | D15A6254 | colon |

[illegible]

adenocarci  
noma  
adenocarci  
noma  
adenocarci  
noma  
Adenocarc  
inoma,  
and  
partial  
mucinous  
adenocarc  
inoma  
adenocarci  
noma  
adenocarci  
noma  
Adenocarc  
inoma,  
and  
partial  
mucinous  
adenocarc  
inoma  
mucinous  
adenocarc  
inoma  
adenocarci  
noma  
adenocarci  
noma  
1.  
Adeno  
carci  
noma,  
some  
signe  
t-  
ring  
cell  
carci  
noma;  
2.  
adeno  
carci  
noma

Female 78 had no adenocarcinoma  
Male 46 had no adenocarcinoma  
Male 79 had no adenocarcinoma  
55 Liver adenocarcinoma in male 55  
Female 56 without whether 1. adenocarcinoma; 2. tubular adenoma  
Female 49 exserosal; adenocarcinoma with extensive carcinoma, partial signet ring cell carcinoma  
Male 48 had no adenocarcinoma  
Female 79 had no adenocarcinoma  
Male 65 had no adenocarcinoma and some mucinous adenocarcinoma  
Male 61 had no adenocarcinoma and some mucinous adenocarcinoma  
Female 40 had no adenocarcinoma and some mucinous adenocarcinoma  
Female 42 liver for mucinous adenocarcinoma  
Female 57 had no mucinous adenocarcinoma  
Female 71 had no adenocarcinoma  
Male 80 had no adenocarcinoma  
Female 44 left otube mesangial or adenocarcinoma  
Male 54 had no adenocarcinoma and some mucinous adenocarcinoma  
Female 81 had no adenocarcinoma, along with neuroendocrine differentiation  
Male 76 had no adenocarcinoma and some mucinous adenocarcinoma  
Male 77 had no adenocarcinoma  
Male 69 without adenocarcinoma  
Female 86 had no adenocarcinoma  
Female 75 had no adenocarcinoma  
Female 76 had no adenocarcinoma  
Female 65 had no adenocarcinoma and some mucinous adenocarcinoma  
Female 55 had no adenocarcinoma and some mucinous adenocarcinoma  
Female 83 had no adenocarcinoma  
Male 81 without 1 adenocarcinoma; 2 adenocarcinoma, with partial nerve  
Female 51 had no adenocarcinoma  
Female 29 had no mucinous adenocarcinoma, with some signet-ring cell carcinoma  
Female 82 had no adenocarcinoma and some mucinous adenocarcinoma  
Male 71 had no adenocarcinoma  
Female 43 had no adenocarcinoma  
Male without any adenocarcinoma  
Male 68 had no adenocarcinoma and some mucinous adenocarcinoma  
Female 60 had no evidence of mucinous adenocarcinoma  
Male 67 had no adenocarcinoma  
Female 61 had no adenocarcinoma



|                         |                                     |                                                                     |                                                                             |
|-------------------------|-------------------------------------|---------------------------------------------------------------------|-----------------------------------------------------------------------------|
| pathological<br>grading | Grade II-III Adventitia grade       | Tumor<br>size<br>Descript<br>ion of<br>tumor<br>site                | 11 * 6 * 2cm right<br>half colon                                            |
|                         | Grade II-III Adventitia grade       |                                                                     | 4*3.6*0.2cm Right<br>half-half of the<br>colon                              |
| II level                | II level                            | 5 * 4 * 3cm right<br>half colon                                     | 6 * 4 * 1cm left<br>half colon                                              |
| II level                | II level                            |                                                                     |                                                                             |
| II level                | Grade II-III Adventitia grade       | 7 * 3.5<br>* 2cm of<br>colonic<br>hepatic<br>curvatur<br>e          | 6.5 * 6.5 * 2cm of<br>the sigmoid colon                                     |
| Level 1. -Level;        | Idionmyelia grade Idionmyelia grade |                                                                     |                                                                             |
| Level 2                 | II-III level                        | 4*3.5*0.5cm The<br>descending colon                                 | 5 * 5 * 1cm right<br>half colon                                             |
| II level                | II level                            |                                                                     |                                                                             |
| II-III                  | II level                            | 6*3.1*0.<br>6cm The<br>ileocaec<br>al colon                         | 7*6*4.5cm Right<br>half-half of the<br>colon                                |
| Level-                  | Level 1. -Level; Level 2            |                                                                     |                                                                             |
| level                   |                                     | 4*3.5*0.5cm The<br>descending colon                                 | 5*3.5*0.8cm<br>(Parmissing) left<br>colon                                   |
| level                   |                                     |                                                                     |                                                                             |
| Idio                    |                                     | 5*4*0.6cm Sigmoid<br>colon                                          | 3*3*0.<br>5cm;2.<br>6*2.2*<br>1.6cm                                         |
| myel                    |                                     |                                                                     |                                                                             |
| ia                      |                                     | 4*3.5*0.<br>8cm 1.<br>sigmoid<br>colon; 2.<br>rectum                | Right<br>hemico<br>lon                                                      |
| grad                    |                                     |                                                                     |                                                                             |
| e                       |                                     | 5.5 *<br>1cm<br>right<br>half<br>colon                              | 5.3*5*<br>1.5cm<br>colon                                                    |
| Idio                    |                                     |                                                                     |                                                                             |
| myel                    |                                     | 7*3.8*0.<br>5cm<br>Right<br>half-<br>half of<br>the<br>colon        | 4*4*1.5cm Right<br>half-half of the<br>colon                                |
| ia                      |                                     |                                                                     |                                                                             |
| grad                    |                                     | 4.5 *<br>4.5 *<br>4cm in<br>the<br>transver<br>se colon             | 6.5 * 3 * 1cm right<br>half colon                                           |
| e                       |                                     |                                                                     |                                                                             |
| II-III level            |                                     | 7.5*6*0.6*4.5*0.7cm<br>2cm LeftLeft half of<br>half of the colon    | 9*6*3.5cm Right<br>half-half of the<br>colon                                |
| II level                |                                     |                                                                     |                                                                             |
| II level                |                                     | The 5 * 5 *<br>3cm sigmoid<br>colon                                 | 11 * 10.5 * 7cm<br>left half colon<br>And 3.5 * 3cm in the<br>sigmoid colon |
| II level                |                                     |                                                                     |                                                                             |
| III level               |                                     | 8 * 4 *<br>4cm<br>right<br>half<br>colon                            | 3.5*2.5cm The<br>descending colon                                           |
| Grade                   |                                     |                                                                     |                                                                             |
| II-III                  |                                     | 5.5*4.5*0.2c<br>m Right half<br>-half of the<br>colon               | 3.5 * 3 * 1cm right<br>half colon                                           |
| Adventi                 |                                     |                                                                     |                                                                             |
| tia                     |                                     | 7 * 3.5<br>* 1cm<br>m Right half<br>ascendin-half of the<br>g colon | 4 * 5 * 1cm in the<br>descending colon                                      |
| grade                   |                                     |                                                                     |                                                                             |
| II-III level            |                                     | 4.5 * 3 *<br>1cm right<br>Transverhalf colon                        | 4.5 * 3.5 * 2cm<br>right half colon                                         |
| II level                |                                     |                                                                     |                                                                             |
| II level                |                                     | 5*5*0.7cm Sigmoid<br>colon                                          | 5*5*0.7cm Sigmoid<br>colon                                                  |
| II level                |                                     |                                                                     |                                                                             |
| III level               |                                     | 6*3*0.5c<br>m<br>Transverhalf colon                                 | 6.5 * 4.5 * 3cm<br>right half colon                                         |
| II level                |                                     |                                                                     |                                                                             |
| II level                |                                     | 5 * 4 * 1cm<br>left half<br>colon                                   | 3.5*2.5*1.5cm<br>Sigmoid colon                                              |
| II level                |                                     |                                                                     |                                                                             |
| II level                |                                     | 7*5*0.5cm Sigmoid<br>colon                                          | 7*5*0.5cm Sigmoid<br>colon                                                  |
| II level                |                                     |                                                                     |                                                                             |
| II level                |                                     | 6*6*1.2cm Left half<br>of the colon                                 | 4 * 3 * 1cm<br>ascending colon                                              |
| II level                |                                     |                                                                     |                                                                             |

|                   |                   |
|-------------------|-------------------|
| 5.5*5*0.5cm       | tumour<br>quality |
| Sigmoid colon     |                   |
| 7 * 6 * 1cm right |                   |
| half colon        |                   |
| 3*2.5*1.8cm       |                   |
| Sigmoid colon     |                   |
| 4.5*3.5*0.8cm     |                   |
| The descending    |                   |
| colon             |                   |
| 7 * 6 * 2cm of    |                   |
| the colon         |                   |
| 6 * 5 * 4cm in    |                   |
| the sigmoid colon |                   |
| 3.5*3*1.5cm Right |                   |
| half-half of the  |                   |
| colon             |                   |
| 2.3*1.7*0.5cm,    |                   |
| 0.7 * 0.6 * 0l.   |                   |
| Left half colon;  |                   |
| 2. rectum         |                   |
| 4*4*2.5cm Sigmoid |                   |
| colon             |                   |

| tumour  | ulcer        |
|---------|--------------|
| tangent | type         |
| plane   | morphology   |
| pigment | of the tumor |
|         | boundaries   |
|         | Ulceration   |
|         | type         |
|         | 1. uplift    |
|         | type; 2.     |
|         | ulcer type   |
|         | E            |
|         | l            |
|         | e            |
|         | v            |
|         | a            |
|         | t            |
|         | e            |
|         | d            |
|         | t            |
|         | y            |
|         | p            |
|         | e            |
|         | bulge        |
|         | b            |
|         | u            |
|         | l            |
|         | g            |
|         | e            |
|         | type         |
|         | u            |
|         | l            |
|         | c            |
|         | e            |
|         | r            |
|         | type         |
|         | t            |
|         | y            |
|         | p            |
|         | e            |
|         | bulge        |
|         | u            |
|         | l            |
|         | c            |
|         | e            |
|         | r            |
|         | type         |
|         | t            |
|         | y            |
|         | p            |
|         | e            |
|         | bulge        |
|         | u            |
|         | l            |
|         | c            |
|         | e            |
|         | r            |
|         | type         |
|         | t            |
|         | y            |
|         | p            |
|         | e            |
|         | bulge        |
|         | u            |
|         | l            |
|         | g            |
|         | e            |
|         | type         |

bul  
ge  
typ  
e  
1.  
Elevf  
ting  
type

Grade 3.5 \* 5 \* 1cm colonic ulcer type  
Grade 3.5\*3\*0.5cm sigmoid colon bulge pattern  
Grade 7 \* 7 \* 2cm right half colon bulge type  
Grade 3\*3\*1.5cm sigmoid colon ulcer type  
Grade 4\*2.5\*0.5cm;1.5\*1\*0.8cm sigmoid colon ulcer type  
Grade II-III 4\*2.5cm right half colon ulcer type  
Grade 6\*5\*1.5cm ileocecal valve ulcer type  
Grade 3.5\*3.5\*0.5cm sigmoid colon ulcer type  
Grade 7 \* 5.5 \* 2cm right half colon ulcer type  
Grade 5.5 \* 4.5 \* 3cm sigmoid colon ulcer type  
Grade II-III 7.5\*7\*1.5cm sigmoid colon ulcer type  
Grade II-III 9\*6.5cm, depressed 0.5-1cm sigmoid colon ulcer type  
Grade II-III 8\*4\*3.5cm colonic bulge pattern  
Grade 6.5 \* 6 \* 1cm right half colon ulcer type  
Grade 4.5\*3\*1.5cm sigmoid colon bulge pattern  
Grade 9.5 \* 7cm sigmoid colon bulge type  
Grade 5 \* 4.5 \* 1cm right half colonic ulcer type  
Grade II-III 9 \* 6 \* 2cm ileocecal valve ulcer type  
Grade II-III 4.5 \* 4 \* 1cm right half colon ulcer type  
Grade 10.5\*5\*1.8cm The right half of the colon bulge type  
Grade 9\*9\*1.5cm left hemicolonic ulcer type  
Grade 4 \* 3.5 \* 2cm sigmoid colon bulge type  
Grade 7.5\*5.5\*0.8cm is of the colonic ulcer type  
Grade II-III 4\*3\*0.5cm colon ulcer type  
Grade II-III 6 \* 4.5 \* 2cm right colon bulge  
Grade II-III 7\*3\*0.5cm right half colon ulcer type  
Grade 6.3\*4.5\*1.9cm sigmoid colon bulge pattern  
Grade 1.; Grade 2. 8.5 \* 4 \* 2cm; small 6.5 \* 5.5 \* 2 right colon bulge  
Grade 3 \* 2.5 \* 1cm right colon bulge  
Grade 4.5\*4.5\*0.4cm in the descending colon, ulcerated type  
Grade II-III 9 \* 5 \* 3cm right half colon bulge type  
Grade 5\*3\*1.2cm right half colon ulcer type  
Grade II-III 5.5\*5.5\*1.5cm sigmoid colon bulge pattern  
Grade 3\*3\*0.3cm left hemicolonic ulcer type  
Grade 5\*4\*3.5cm The right half of the colon bulge type  
Grade II-III 4\*3\*2.8cm ileocecal ulcer type  
Grade 9.5 \* 4 \* 1cm right half colon ulcer type  
Grade II-III 4.5 \* 3cm, the mass has been removed sigmoid ulcer type

Is there any recidivism

Degree of infiltration organs (yes, recidivism organ details of vascular invasion of nerve invasion of lymph node details

No, unknown)

Inserosal carcinoma plug (+) nerve invasion (-) paracal lymph nodes: (2 / 6); mesenteric lymph nodes  
Intranseosal fibrous adipose tissue group extradseosal fibrous adipose cancer thrombus (+) nerve invasion  
(-) Perienteral lymph nodes (1 / 75) see cancer metastasis.

PTec (-) nerve invasion (-) mesenteric lymph node: (0 / 9); mesenteric lymph

1. Serosal layer; 2. Deep muscle layer endovascular cancer thrombus (-) nerve invasion (-) 12  
perienteral lymph nodes and additional mesenteric root lymph

And cancer thrombus (+) invasion of the nerve in (-) periileal lymph nodes: (0 / 3); around the  
ascending colon

Exserosal, parasososal and omental, parserosal and intravosal cancer plugs (+) nerve invasion (+)  
pericolonic lymph nodes: (1 / 9); mesenteric lymph

Extranosal carcinoma thrombus (-) nerve invasion (-) intestine: (0 / 28)

Extranseosal carcinoma plug (-) nerve invasion (-) 3 proximal lymph nodes and 11 lymph nodes around  
the mass

Extranseosal carcinoma thrombus (-) nerve invasion (-) 0 / 2 periileal lymph nodes, paracumal lymph  
nodes

Intravasosal fibrous fat group (-) nerve invasion (-) paracacal lymph nodes (1 / 26)

Extranosal carcinoma thrombus (-) nerve invasion (-) periileal lymph nodes: (0 / 2); pericolonic lymph

Exserosal membrane and see several carcinoma nodules (+) nerve invasion (-) perienteral lymph nodes: (9  
/ 20)

No cancer metastasis in — — mesenteric lymph nodes (0 / 10).

Extranseosal carcinoma thrombus (-) nerve invasion (+) perienteral lymph node: (0 / 18).

Extranseosal carcinoma thrombus (-) nerve invasion (-) peritumoral lymph nodes: (0 / 17)

Cancer plug of the serosal vein (-) nerve invasion (-) periileal lymph nodes: (0 / 10); pericolonic  
lymph

Intravasososal cancer thrombus (+) nerve invasion (-) i-tumor lymph nodes: (1 / 8). Colonic mesangia

Extranseosal carcinoma thrombus (-) nerve invasion (-) proximal lymph node (0 / 18), peritumoral lymph  
nodes

Intravasosal cancer thrombus (-) nerve invasion (-) paratoplastic lymph nodes: (0 / 11); mesenteric lymph  
nodes

Extranosal carcinoma thrombus (-) nerve invasion (-) peritumor lymph nodes: (4 / 37).

Inserosal carcinoma thrombus (-) nerve invasion (-) paratumoral lymph node: (0 / 5); proximal mesenteric  
lymph

Extranosal carcinoma thrombus (-) nerve invasion (-) periileal lymph nodes: (1 / 8); around the mass

Extranosal carcinoma thrombus (-) nerve invasion (-) perienteral lymph nodes: (0 / 12); highest  
cluster lymph nodes

Extranosal carcinoma thrombus (+) nerve invasion (-) paracal lymph node: (0 / 12).

Inserosal carcinoma thrombus (+) nerve invasion (-) peritumor lymph nodes: (0 / 11).

Inthrombus (+) nerve invasion (-) peritumor lymph nodes: (0 / 10).

Extranosal carcinoma thrombus (-) nerve invasion (-) small mesenteric lymph nodes: (0 / 6):  
surrounding tumor

Extranosal carcinoma thrombus (+) nerve invasion (-) peritumor lymph nodes: (2 / 13); mesenteric lymph

Inthrombus (+) nerve invasion (+) peritumor lymph nodes: (8 / 11).

Intravascular carcinoma serosal thrombus (-) nerve invasion (-) perienteral lymph node: (0 / 13).

Extranosal carcinoma plug (+) nerve invasion (-) pericolonic lymph nodes: (0 / 3); surrounding the mass  
and

Cancer thrombus (-) nerve invasion (-) peritumor lymph nodes: (0 / 21).

Cancer plug (-) nerve invasion (-) proximal tumor node: (0 / 4), distal tumor

Primary carcinoma plug (-) nerve invasion (-) perienteral lymph nodes: (1 / 29).

A cancer thrombus (-) nerve invasion (-) lymph nodes around the ileum: (0 / 27). Around the colon

Cancer thrombus (-) nerve invasion (-) paracar lymph node (0 / 15).

Inserosal carcinoma plug (-) nerve invasion (-) perienteral lymph nodes: (0 / 14); highest cluster  
lymph nodes

Serosal layer; periintestinal carcinoma nodules form intradessel thrombus (+) nerve invasion (-)

Extranosal carcinoma thrombus (-) nerve invasion (-) pericolonic lymph nodes: (0 / 5); around the mass

Intranasosal fibrous adipose group in extrasosal fibrous adipose tissue cancer thrombus (+) nerve  
invasion (+) lymph nodes around tumor: (4 / 19), additional bowel

Inthrombus (-) nerve invasion (-) ileocaecal lymph node: (0 / 11); mass distal lymph

Inserosal carcinoma thrombus (-) nerve invasion (+) perienteral lymph node: (0 / 12).

Inserosal carcinoma plug (-) nerve invasion (-) pericolonic lymph nodes: (1 / 21); ileocecal gonorrhea

Extranosal carcinoma thrombus (-) nerve invasion (+) perienteral lymph nodes: (3 / 14); highest  
cluster lymph nodes

Primary tumor plug (-) nerve invasion (-) peritumor lymph nodes: (8 / 16); highest mass lymph

Extranodal carcinoma thrombus (-) nerve invasion (-) peritumor lymph nodes: (0 / 14); perienteral lymph

Cancer thrombus (+) of adventitial fibroadipose tissue (+ near tumor lymph node: (2 / 15), mesenteric lymph

Neurological invasion of (+) peritumor lymph nodes: (0 / 18).

Extranodal carcinoma thrombus (-) nerve invasion (-) pericolic lymph nodes: (0 / 15), around the ileum

Intraluminal carcinoma plug (-) nerve invasion (-) peritumor lymph nodes: (0 / 4); perienteral lymph

Extranodal carcinoma thrombus (-) nerve invasion (-) paracolic lymph nodes: (4 / 10); perienteral lymph nodes

Intraluminal carcinoma thrombus (+) nerve invasion (-) peritumor lymph nodes: (0 / 18), highest cluster lymph

The serosal layer involved the intraluminal carcinoma plug of the left oviduct (-) nerve invasion (-) paracolic lymph nodes: (0 / 9).

Intravascular carcinoma in the deep muscle layer (-) nerve invasion (-) ileocaecal lymph nodes: (0 / 4); paracolic lymph nodes

1. Extraluminal carcinoma thrombus (-) nerve invasion (-) 28 perienteral lymph nodes showed reactive hyperplasia.

The deep muscle vein cancer thrombus (-) nerve invasion (-) perienteral lymph node (0 / 11).

|                                                                                                      |                                                         |                                                                 |
|------------------------------------------------------------------------------------------------------|---------------------------------------------------------|-----------------------------------------------------------------|
| Exserosal, and extrasosal carcinoma nodules were seen                                                | Intravesal carcinoma plug (-) nerve invasion (+)        | Paracal lymph nodes: (1 / 5); perienteral lymph nodes:          |
| Outside the plasma membrane                                                                          | Intravesal carcinoma plug (-) nerve invasion (+)        | Perienteral lymph nodes: (6 / 14).                              |
| chorion                                                                                              | Intravesal carcinoma plug (-) nerve invasion (-)        | Paracalucous lymph nodes: (0 / 18).                             |
| Outside the plasma membrane                                                                          | Intravesal carcinoma plug (-) nerve invasion (+)        | Perienteral lymph nodes: (2 / 7).                               |
| Outside the plasma membrane                                                                          | Intravesal cancer plug (-) nerve invasion (-)           | Paracaleteous lymph nodes: (5 / 10).                            |
| Exserosal; appendix with extensive cancerous nodules                                                 | Intravesal cancer plug (+) nerve invasion (+)           | Paracumoral lymph nodes: (9 / 9), pericolonic lymph             |
| placenta percreta                                                                                    | Intravesal cancer plug (+) nerve invasion (-)           | Paracileal lymph nodes: (0 / 9); paracal lymph nodes            |
| Near the serous membrane of the deep muscle layer                                                    | Intravesal cancer plug (-) nerve invasion (-)           | Peripерitumoral lymph nodes: (0 / 17).                          |
| Outside the plasma membrane                                                                          | Intravesal cancer plug (-) nerve invasion (-)           | Mesenteric lymph nodes: (0 / 11); mesenteric lymph              |
| Outside the plasma membrane                                                                          | Intravesal cancer plug (-) nerve invasion (-)           | Perienteral lymph nodes: (0 / 22); mesenteric lymph nodes:      |
| Outside the plasma membrane                                                                          | Intravesal cancer plug (+) nerve invasion (-)           | Perienteral lymph nodes: (0 / 10).                              |
| Outside the plasma membrane                                                                          | Intravesal cancer plug (-) nerve invasion (-)           | Peripерitumoral lymph nodes: (0 / 13).                          |
| Deep muscle layer                                                                                    | Intravesal cancer plug (-) nerve invasion (-)           | Perienteral lymph nodes: (0 / 5); peritumor lymph nodes         |
| placenta percreta                                                                                    | Intravesal cancer plug (-) nerve invasion (-)           | Peripostimolonic lymph nodes: (0 / 31).                         |
| Outside the plasma membrane                                                                          | Intravesal cancer plug (-) nerve invasion (+)           | Peritumor lymph nodes: (0 / 8); mesenteric lymph                |
| Outside the plasma membrane                                                                          | Intravesal cancer plug (-) nerve invasion (-)           | Mass lymph nodes: (0 / 20); mesenteric root                     |
| placenta percreta                                                                                    | Intravesal cancer plug (-) nerve invasion (-)           | Mass lymph nodes: (0 / 3); mesenteric lymph                     |
| Outside the plasma membrane                                                                          | Intravesal cancer plug (-) nerve invasion (-)           | Pericolonic lymph nodes: (0 / 4); peritumoral gonorrhea         |
| Outside the plasma membrane                                                                          | Intravesal cancer plug (+) nerve invasion (+)           | Pericolon lymph nodes: (4 / 6); ileocecal lymph                 |
| chorion                                                                                              | Intravesal cancer plug (-) nerve invasion (-)           | Total number of ileocecal lymph nodes: (0 / 11).                |
| The serosal layer is found adjacent to the splenic capsule                                           | Intravesal cancer plug (-) nerve invasion (-)           | Lymph nodes around the mass: (0 / 21).                          |
| chorion                                                                                              | Intravesal cancer plug (+) nerve invasion (-)           | Highcluster lymph nodes: (0 / 1); peritumoral lymph             |
| Fiber fat in the serous layer                                                                        | Intravesal cancer plug (+) nerve invasion (-)           | Paracalucous lymph nodes: (5 / 13).                             |
| Within the fibrous adipose tissue of the serosal layer                                               | Intravesal cancer plug (+) nerve invasion (+)           | Perienteral lymph nodes: (20 / 20); highest cluster lymph nodes |
| Outside the plasma membrane                                                                          | Intructal cancer thrombus (suspected nerve invasion (-) | Pericolonic lymph nodes: (0 / 5); lymph around the mass         |
| Outside the plasma membrane                                                                          | Intravesal cancer plug (-) nerve invasion (-)           | Mass lymph nodes: (0 / 17); mesenteric lymph nodes              |
| muscular coat                                                                                        | Intravesal cancer plug (-) nerve invasion (-)           | Peritumor lymph nodes: (0 / 7) (after careful search            |
| Extranasosal focal appendicular mesangial intravesal carcinoma thrombus (+) nerve invasion (+)       |                                                         | Large parac-lymph nodes (0 / 9), small swelling                 |
| Myometrium, focal about 1 / 2 muscularis carcinoma thrombus (-) nerve invasion (-)                   |                                                         | Periileal lymph nodes: (0 / 8); pericolonic lymph               |
| Intranseosal carcinoma thrombus (-) nerve invasion (-)                                               |                                                         | Lymph nodes around the mass: (7 / 16).                          |
| Extranseosal carcinoma thrombus (+) nerve invasion (-)                                               |                                                         | Periileal lymph nodes: (0 / 8); pericolonic lymph               |
| Cancer thrombus (+) nerve invasion (-)                                                               |                                                         | Two pericolonic lymph nodes and peripheral mass lymph nodes     |
| Cancer thrombus (+) in the deep muscle layer (-)                                                     |                                                         | Peripерitumoral lymph nodes: (0 / 29).                          |
| A suspected nerve invasion (-) was seen in an extraserosal vein                                      |                                                         | Paracumoral lymph nodes: (0 / 6); mesenteric lymph nodes        |
| Deep muscle layer, with suspected focal involvement of serosal carcinoma plug (-) nerve invasion (-) |                                                         | Mesenteric lymph nodes: (0 / 8); para-mass lymph                |
| The serosal layer involved the ileal wall carcinoma thrombus (-)                                     |                                                         | The lymph nodes around the mass: (9 /                           |

nerve invasion (-)

Extranseosal carcinoma thrombus (+) nerve invasion (+)

Cancer thrombus (-) nerve invasion (-)

12); periileal lymph

Proximal lymph node of the mass: (0  
/ 15); distal to the mass

Paracalal lymph node (9 / 15), small  
mesenteric lymph



| Total number of lymph nodes | Positive lymph nodes | T   | N   | M  | 7th Edition clinical staging | Organization coding | The CD8 positive rate of HCoLA 180 Su21 | The PDL 1 intensity of the HCoLA 180 Su21 |
|-----------------------------|----------------------|-----|-----|----|------------------------------|---------------------|-----------------------------------------|-------------------------------------------|
|                             | 2                    | T3  | N1  | MO |                              | D15A5131            |                                         |                                           |
| 30                          | 1                    | T4b | N1  | MO | 3                            | D15A5133            | 5%                                      | 1                                         |
| 75                          | 0                    | T3  | NO  | MO | 3                            | D15A5139            | 1%                                      | 1                                         |
| 17                          | 0                    | T3  | NO  | MO | 2                            | D15A5173            | 2%                                      | 1.5                                       |
| 13                          | 0                    | T4b | N1  | M1 | 2                            | D15A5144            | 1%                                      | 2                                         |
| 20                          | 2                    | T4a | NO  | MO | 4                            | D15A5146            | 3%                                      | 2                                         |
| 16                          | 0                    | T4a | NO  | MO | 2                            | D15A5147            | 5%                                      | 1.5                                       |
| 28                          | 0                    | T4a | N1  | MO | 2                            | D15A5157            | Less than 1%                            | 2                                         |
| 18                          | 2                    | T4b | N1  | MO | 2                            | D15A5150            | 1%                                      | 1                                         |
| 19                          | 1                    | T4a | N1  | MO | 3                            | D15A5151            | 5%                                      | —                                         |
| 26                          | 1                    | T4a | N2  | MO | 3                            | D15A5152            | 1%                                      | 1                                         |
| 21                          | 9                    | T3  | NO  | MO | 3                            | D15A5169            | 1%                                      | 1                                         |
| 20                          | 0                    | T4a | NO  | MO | 2                            | D15A6034            | Less than 1%                            | 1                                         |
| 10                          | 0                    | T4a | NO  | MO | 2                            | D15A5848            | 1%                                      | 1                                         |
| 18                          | 0                    | T3  | NO  | MO | 2                            | D15A5790            | 5%                                      | 2                                         |
| 17                          | 0                    | T4b | N1  | MO | 2                            | D15A5793            | 2%                                      | 1                                         |
| 25                          | 1                    | T4a | NO  | MO | 2                            | D15A5797            | 2%                                      | 1.5                                       |
| 17                          | 0                    | T4b | NO  | MO | 3                            | D15A5794            | 5%                                      | 1.5                                       |
| 26                          | 0                    | T4a | N2  | MO | 2                            | D15A5795            | 7%                                      | 2                                         |
| 15                          | 4                    | T3  | N1  | MO | 2                            | D15A5796            | 5%                                      | 3                                         |
| 37                          | 2                    | T4a | N1  | MO | 3                            | D15A5792            | 15%                                     | 2                                         |
| 15                          | 3                    | T4a | NO  | MO | 3                            | D15A5875            | 2%                                      | 2                                         |
| 23                          | 0                    | T4a | NO  | MO | 3                            | D15A5800            | 1%                                      | 1                                         |
| 16                          | 0                    | T3  | NO  | MO | 2                            | D15A5851            | 2%                                      | 1.5                                       |
| 12                          | 0                    | T4a | NO  | MO | 2                            | D15A5876            | 3%                                      | 2                                         |
| 11                          | 0                    | T4a | NO  | MO | 2                            | D15A5877            | 3%                                      | 1.5                                       |
| 10                          | 0                    | T4a | N1  | MO | 2                            | D15A5878            | Less than 1%                            | 0                                         |
| 33                          | 2                    | T4a | N2  | MO | 2                            | D15A5879            | 5%                                      | 3                                         |
| 23                          | 8                    | T3  | NO  | MO | 3                            | D15A5880            | 2%                                      | 1.5                                       |
| 11                          | 0                    | T4a | NO  | MO | 3                            | D15A5802            | 1%                                      | 1.5                                       |
| 13                          | 0                    | T3  | NO  | MO | 2                            | D15A5803            | 3%                                      | 1.5                                       |
| 30                          | 0                    | T3  | NO  | MO | 2                            | D15A5804            | 1%                                      | 1                                         |
| 21                          | 0                    | T3  | N1  | MO | 2                            | D15A5805            | 2%                                      | 3                                         |
| 21                          | 1                    | T2  | NO  | MO | 2                            | D15A5806            | 2%                                      | 1                                         |
| 29                          | 0                    | T3  | NO  | MO | 3                            | D15A5808            | 3%                                      | 2                                         |
| 43                          | 0                    | T3  | NO  | MO | 1                            | D15A5882            | Less than 1%                            | 1                                         |
| 15                          | 0                    | T3  | N1c | MO | 2                            | D15A5882            | Less than 1%                            | 1                                         |
| 15                          | 0                    | T4a | N1  | MO | 2                            | D15A5809            | 20%                                     | 2                                         |
| 14                          | 0                    | T4b | N2  | MO | 3                            | D15A5852            | 1%                                      | 1.5                                       |
| 11                          | 2                    | T3  | NO  | MO | 3                            | D15A5883            | 2%                                      | 0                                         |
| 28                          | 4                    | T3  | NO  | MO | 3                            | D15A5810            | 5%                                      | 3                                         |
| 25                          | 0                    | T3  | NO  | MO | 2                            | D15A5811            | Less than 1%                            | 2                                         |
| 17                          | 0                    | T3  | N1  | MO | 2                            | D15A5812            | 3%                                      | 1.5                                       |
| 12                          | 1                    | T4a | N1  | MO | 2                            | D15A5813            | 2%                                      | 1.5                                       |
| 34                          | 3                    | T3  | N2  | MO | 3                            | D15A5884            | 1%                                      | 1.5                                       |
| 15                          | 8                    | T4a | NO  | MO | 3                            | D15A5814            | 3%                                      | 1.5                                       |
| 22                          | 0                    | T3  | N1  | MO | 3                            | D15A5816            | 7%                                      | 2                                         |
| 21                          | 0                    | T4a | NO  | MO | 2                            | D15A5815            | 3%                                      | 3                                         |
| 17                          | 2                    | T4a | NO  | MO | 3                            | D15A5885            | Less than 1%                            | 1.5                                       |
| 17                          | 0                    | T3  | NO  | MO | 2                            | D15A5817            | 25%                                     | 3                                         |
| 18                          | 0                    | T4a | N2  | MO | 2                            | D15A5818            | 3%                                      | 1.5                                       |
| 37                          | 0                    | T3  | NO  | MO | 2                            | D15A5819            | 3%                                      | 1.5                                       |
| 16                          | 4                    | T4b | NO  | MO | 3                            | D15A5820            | 2%                                      | 0                                         |
| 13                          | 0                    | T2  | NO  | MO | 2                            | D15A6202            | 1%                                      | 1.5                                       |
| 19                          | 0                    | T4a | NO  | MO | 2                            | D15A6191            | 5%                                      | 2                                         |
| 9                           | 0                    | T2  | NO  | MO | 1                            |                     |                                         |                                           |
| 11                          | 0                    |     |     |    | 2                            |                     |                                         |                                           |
| 28                          | 0                    |     |     |    | 1                            |                     |                                         |                                           |
| 11                          |                      |     |     |    |                              |                     |                                         |                                           |

|    |    |     |    |    |   |
|----|----|-----|----|----|---|
| 12 | 1  | T4a | N1 | MO | 3 |
| 14 | 6  | T4a | N2 | MO | 3 |
| 18 | 0  | T3  | NO | MO | 2 |
| 7  | 2  | T4a | N1 | M1 | 4 |
| 10 | 5  | T4a | N2 | MO | 3 |
| 13 | 9  | T4b | N2 | M1 | 4 |
| 34 | 0  | T3  | NO | MO | 2 |
| 17 | 0  | T2  | NO | MO | 1 |
| 19 | 0  | T4a | NO | MO | 2 |
| 28 | 0  | T4a | NO | MO | 2 |
| 10 | 0  | T4a | NO | MO | 2 |
| 13 | 0  | T4a | NO | M1 | 4 |
| 15 | 0  | T2  | NO | MO | 1 |
| 31 | 0  | T3  | NO | MO | 2 |
| 25 | 0  | T4a | NO | MO | 2 |
| 23 | 0  | T4a | NO | M1 | 4 |
| 11 | 0  | T3  | NO | MO | 2 |
| 22 | 0  | T4a | NO | MO | 2 |
| 18 | 4  | T4a | N2 | MO | 3 |
| 11 | 0  | T3  | NO | MO | 2 |
| 21 | 0  | T3  | NO | MO | 2 |
| 12 | 0  | T3  | NO | MO | 2 |
| 13 | 5  | T3  | N2 | MO | 3 |
| 24 | 24 | T3  | N2 | MO | 3 |
| 34 | 0  | T4a | NO | MO | 2 |
| 25 | 0  | T4a | NO | MO | 2 |
| 7  | 0  | T2  | NO | MO | 1 |
| 25 | 9  | T4b | N2 | MO | 3 |
| 18 | 0  | T2  | NO | MO | 1 |
| 16 | 7  | T4a | N2 | MO | 3 |
| 20 | 1  | T4a | N1 | MO | 3 |
| 19 | 0  | T3  | NO | MO | 2 |
| 29 | 0  | T2  | NO | MO | 1 |
| 15 | 0  | T4a | NO | MO | 2 |
| 27 | 0  | T2  | NO | MO | 1 |
| 23 | 9  | T4b | N2 | MO | 3 |
| 52 | 7  | T4a | N2 | MO | 3 |
| 16 | 9  | T3  | N2 | MO | 3 |

|          |              |     |
|----------|--------------|-----|
| D15A6197 | Less than 1% | 2   |
| D15A6198 | 5%           | 1   |
| D15A6199 | 1%           | 1   |
| D15A6201 | 3%           | 2   |
| D15A6204 | 3%           | 1   |
| D15A6205 | 10%          | 1.5 |
| D15A6206 | 2%           | 2   |
| D15A6207 | 1%           | 3   |
| D15A6208 | 1%           | 1.5 |
| D15A6209 | 1%           | 2   |
| D15A6210 | 5%           | 2   |
| D15A6211 | Less than 1% | 1.5 |
| D15A6212 | 1%           | 1.5 |
| D15A6213 | 5%           | 3   |
| D15A6214 | 5%           | 3   |
| D15A6217 | 5%           | 3   |
| D15A6218 | 1%           | 2   |
| D15A6219 | 10%          | 2.5 |
| D15A6220 | Less than 1% | 1.5 |
| D15A6221 | 5%           | 2   |
| D15A6222 | 3%           | 2.5 |
| D15A6224 | 1%           | 2   |
| D15A6228 | Less than 1% | 2   |
| D15A6229 | 3%           | 2   |
| D15A6230 | 5%           | 2   |
| D15A6231 | 5%           | 2   |
| D15A6247 | 7%           | 3   |
| D15A6248 | Less than 1% | 1   |
| D15A6249 | 15%          | 2   |
| D15A6252 | 1%           | 1   |
| D15A5140 | 15%          | 3   |
| D15A5141 | 5%           | 3   |
| D15A5874 | Less than 1% | 1.5 |
| D15A5801 | 1%           | 2   |
| D15A6195 | 7%           | 2   |
| D15A6200 | 5%           | 0   |
| D15A6253 | 1%           | 1.5 |
| D15A6254 | 2%           | 1   |

| PDL 1 positive rate of HCo1A<br>180 Su21 HCo1A 180 Su21 PD1<br>positive rate |              |
|------------------------------------------------------------------------------|--------------|
| Less than 1%                                                                 | Less than 1% |
| Less than 1%                                                                 | Less than 1% |
| 1%                                                                           | Less than 1% |
| Less than 1%                                                                 | Less than 1% |
| 5%                                                                           | 1%           |
| 1%                                                                           | Less than 1% |
| 2%                                                                           | Less than 1% |
| 1%                                                                           | Less than 1% |
| —                                                                            | 1%           |
| Less than 1%                                                                 | 0%           |
| Less than 1%                                                                 | Less than 1% |
| Less than 1%                                                                 | 0%           |
| Less than 1%                                                                 | Less than 1% |
| 1%                                                                           | 5%           |
| Less than 1%                                                                 | Less than 1% |
| 1%                                                                           | 2%           |
| 5%                                                                           | 5%           |
| 1%                                                                           | 7%           |
| 5%                                                                           | 5%           |
| 30%                                                                          | 5%           |
| 1%                                                                           | 5%           |
| 5%                                                                           | 1%           |
| Less than 1%                                                                 | 1%           |
| 5%                                                                           | 3%           |
| 1%                                                                           | 2%           |
| 0%                                                                           | Less than 1% |
| 1%                                                                           | 7%           |
| Less than 1%                                                                 | 1%           |
| 10%                                                                          | Less than 1% |
| Less than 1%                                                                 | 5%           |
| 1%                                                                           | 3%           |
| Less than 1%                                                                 | 2%           |
| Less than 1%                                                                 | 3%           |
| Less than 1%                                                                 | 1%           |
| 35%                                                                          | 20%          |
| 1%                                                                           | 3%           |
| 0%                                                                           | 2%           |
| Less than 1%                                                                 | 5%           |
| 10%                                                                          | 0%           |

| Organizational coding | BRAF Mutation (V600E) | KRAS sudden change | The NRAS mutation, G12C / D / S | NRAS sudden change Q61R/L/H/K |
|-----------------------|-----------------------|--------------------|---------------------------------|-------------------------------|
| D15A5131              | wild type             | wild type          | wild type                       | wild type                     |
| D15A5133              | wild type             | wild type          | wild type                       | wild type                     |
| D15A5139              | wild type             | wild type          | wild type                       | wild type                     |
| D15A5173              | wild type             | wild type          | wild type                       | wild type                     |
| D15A5144              | wild type             | wild type          | wild type                       | wild type                     |
| D15A5146              | wild type             | wild type          | wild type                       | wild type                     |
| D15A5147              | wild type             | wild type          | wild type                       | wild type                     |
| D15A5157              | wild type             | 3 at codon 12      | wild type                       | wild type                     |
| D15A5150              | wild type             | wild type          | wild type                       | wild type                     |
| D15A5151              | mutant                | wild type          | wild type                       | wild type                     |
| D15A5152              | wild type             | 3 at codon 12      | wild type                       | wild type                     |
| D15A5169              | wild type             | wild type          | wild type                       | wild type                     |
| D15A6034              |                       |                    |                                 |                               |
| D15A5848              | wild type             | 3 at codon 12      | wild type                       | wild type                     |
| D15A5790              | wild type             | 3 at codon 12      | wild type                       | wild type                     |
| D15A5793              | wild type             | wild type          | wild type                       | wild type                     |
| D15A5797              | wild type             | 3 at codon 13      | wild type                       | wild type                     |
| D15A5794              | wild type             | 3 at codon 12      | wild type                       | wild type                     |
| D15A5795              | wild type             | 3 at codon 12      | wild type                       | wild type                     |
| D15A5796              | wild type             | wild type          | wild type                       | wild type                     |
| D15A5792              | wild type             | 3 at codon 12      | wild type                       | wild type                     |
| D15A5875              | wild type             | wild type          | wild type                       | wild type                     |
| D15A5800              | wild type             | wild type          | wild type                       | wild type                     |
| D15A5851              | wild type             | wild type          | wild type                       | wild type                     |
| D15A5876              | wild type             | 3 at codon 12      | wild type                       | wild type                     |
| D15A5877              | wild type             | wild type          | wild type                       | wild type                     |
| D15A5878              | wild type             | wild type          | wild type                       | Mutant type Q61H              |
| D15A5879              | wild type             | wild type          | wild type                       | wild type                     |
| D15A5880              | mutant                | 3 at codon 12      | wild type                       | wild type                     |
| D15A5802              | wild type             | wild type          | wild type                       | wild type                     |
| D15A5803              | wild type             | wild type          | wild type                       | wild type                     |
| D15A5804              | wild type             | wild type          | wild type                       | Mutant type of Q61R           |
| D15A5805              | wild type             | 3 at codon 12      | wild type                       | wild type                     |
| D15A5806              | wild type             | wild type          | wild type                       | wild type                     |
| D15A5808              | wild type             | wild type          | wild type                       | wild type                     |
| D15A5882              | wild type             | wild type          | wild type                       | wild type                     |
| D15A5809              | wild type             | wild type          | wild type                       | wild type                     |
| D15A5852              | wild type             | wild type          | wild type                       | wild type                     |
| D15A5883              | wild type             | 3 at codon 13      | wild type                       | wild type                     |
| D15A5810              | wild type             | 3 at codon 12      | wild type                       | wild type                     |
| D15A5811              | wild type             | 3 at codon 13      | wild type                       | wild type                     |
| D15A5812              | wild type             | wild type          | wild type                       | wild type                     |
| D15A5813              | wild type             | wild type          | wild type                       | wild type                     |
| D15A5884              | wild type             | wild type          | wild type                       | wild type                     |
| D15A5814              | wild type             | wild type          | wild type                       | wild type                     |
| D15A5816              | wild type             | 3 at codon 12      | wild type                       | Mutant type Q61H              |

|          |           |                  |           |           |
|----------|-----------|------------------|-----------|-----------|
| D15A5815 | wild type | 3 at codon<br>12 | wild type | wild type |
| D15A5885 | wild type | wild type        | wild type | wild type |
| D15A5817 | wild type | wild type        | wild type | wild type |
| D15A5818 | wild type | wild type        | wild type | wild type |
| D15A5819 | wild type | 3 at codon<br>12 | wild type | wild type |
| D15A5820 | wild type | wild type        | wild type | wild type |
| D15A6202 | wild type | wild type        | wild type | wild type |
| D15A6191 | wild type | wild type        | wild type | wild type |
| D15A6192 | wild type | wild type        | wild type | wild type |
| D15A6194 |           |                  |           |           |

|              |              |
|--------------|--------------|
| Less than 1% | 0%           |
| Less than 1% | 3%           |
| Less than 1% | 1%           |
| 5%           | 1%           |
| Less than 1% | 3%           |
| 30%          | 10%          |
| Less than 1% | 3%           |
| 1%           | 3%           |
| Less than 1% | 1%           |
| 1%           | 1%           |
| 1%           | 3%           |
| 1%           | Less than 1% |
| 5%           | Less than 1% |
| 15%          | 15%          |
| 10%          | 7%           |
| 25%          | 5%           |
| 1%           | 1%           |
| 100%         | 5%           |
| Less than 1% | 1%           |
| 30%          | 7%           |
| 45%          | 2%           |
| 5%           | 2%           |
| Less than 1% | Less than 1% |
| 5%           | 1%           |
| 60%          | 3%           |
| 1%           | 5%           |
| 1%           | 7%           |
| 5%           | Less than 1% |
| 2%           | 2%           |
| 1%           | Less than 1% |

|          |           |                                     |                     |
|----------|-----------|-------------------------------------|---------------------|
| D15A6197 | wild type | Codon 133 wild type                 | wild type           |
| D15A6198 |           |                                     |                     |
| D15A6199 | wild type | Wild-type wild-type                 | wild type           |
| D15A6201 |           |                                     |                     |
| D15A6204 | wild type | Wild-type wild-type                 | Mutant type of Q61K |
| D15A6205 | wild type | Wild-type wild-type                 | wild type           |
| D15A6206 | wild type | Wild-type wild-type                 | wild type           |
| D15A6207 | wild type | Wild-type wild-type                 | wild type           |
| D15A6208 | wild type | Codon 133 wild type                 | wild type           |
| D15A6209 | wild type | Wild-type wild-type                 | wild type           |
| D15A6210 | wild type | Wild-type wild-type                 | wild type           |
| D15A6211 | wild type | Wild-type of 3 at codon 12          | wild type           |
| D15A6212 | wild type | Wild-type form of the 3 at codon 12 | wild type           |
| D15A6213 | wild type | Wild-type wild-type                 | wild type           |
| D15A6214 | wild type | Wild-type wild-type                 | wild type           |
| D15A6217 | wild type | Wild-type wild-type                 | wild type           |
| D15A6218 | wild type | Wild-type form of the 3 at codon 12 | wild type           |
| D15A6219 | wild type | Wild-type wild-type                 | wild type           |
| D15A6220 |           |                                     |                     |
| D15A6221 | wild type | Wild-type of 33 at codon 13         | wild type           |
| D15A6222 | wild type | Wild-type form of the 3 at codon 12 | wild type           |
| D15A6224 | wild type | Wild-type form of the 3 at codon 12 | wild type           |
| D15A6228 | wild type | Wild-type of 33 at codon 13         | wild type           |
| D15A6229 | wild type | Wild-type wild-type                 | wild type           |
| D15A6230 | wild type | Wild-type wild-type                 | wild type           |
| D15A6231 | wild type | Wild-type wild-type                 | wild type           |
| D15A6247 |           |                                     |                     |
| D15A6248 | wild type | Wild-type wild-type                 | wild type           |
| D15A6249 |           |                                     |                     |
| D15A6252 |           |                                     |                     |
| D15A5140 | wild type | Wild-type wild-type                 | wild type           |
| D15A5141 | wild type | Wild-type wild-type                 | wild type           |
| D15A5874 | wild type | Wild-type wild-type                 | wild type           |
| D15A5801 | wild type | Wild-type wild-type                 | wild type           |
| D15A6195 | wild type | Wild-type of 33 at codon 13         | wild type           |
| D15A6200 | wild type | Wild-type form of the 3 at codon 12 | wild type           |
| D15A6253 |           |                                     |                     |
| D15A6254 |           |                                     |                     |
