# Supplementary material for: DHCR7: from sterol biosynthesis to oncogenic role in colorectal cancer
Source: PeerJ journal article supplement (doi:10.7717/peerj.20323), 2025-11-20
Supplement: Table_S2.docx [file Table_S2.docx]

**Supplemental File**

**Table S2. List of primary antibodies**

| Antigens | Species | Dilution  (IHC) | Dilution  (WB) | Supplier |
| --- | --- | --- | --- | --- |
| CDK4 | polyclonal |  | 1:1000 | proteintech, CN, Cat No. 11026-1-AP |
| Cyclin D1 | polyclonal |  | 1:1000 | proteintech, CN, Cat No : 26939-1-AP |
| BAX | polyclonal |  | 1:1000 | proteintech, CN, Cat. Cat No. 50599-2-Ig |
| BCL-2 | polyclonal |  | 1:1000 | proteintech, CN, Cat. NO. 12789-1-AP |
| E-cadherin | polyclonal |  | 1:1000 | proteintech, CN, Cat no : 20874-1-AP |
| N-cadherin | polyclonal |  | 1:1000 | proteintech, CN, Cat No. 22018-1-AP |
| MMP-9 | polyclonal |  | 1:1000 | proteintech, CN, Cat No. 27306-1-AP |
| Vimentin | monoclonal |  | 1:1000 | proteintech, CN, Cat No : 60330-1-Ig |
| PI3K | monoclonal |  | 1:1000 | proteintech, CN, Cat no : 20584-1-AP |
| mTOR | polyclonal |  | 1:1000 | proteintech, CN, Cat No. 66888-1-Ig |
| p-mTOR | monoclonal |  | 1:1000 | proteintech, CN, Cat No. 67778-1-Ig |
| DHCR7 | polyclonal | 1:200 | 1:1000 | affbiotech, CN, Cat. No Q9UBM7 |
| p-AKT | monoclonal |  | 1:1000 | proteintech, CN, Cat No. 66444-1-Ig |
| AKT | monoclonal |  | 1:1000 | proteintech, CN, Cat No. 60203-2-Ig |
| GAPDH | monoclonal |  | 1:1000 | proteintech, CN, Cat No. 60004-1-Ig |
