# Supplementary material for: DHCR7: from sterol biosynthesis to oncogenic role in colorectal cancer
Source: PeerJ journal article supplement (doi:10.7717/peerj.20323), 2025-11-20
Supplement: Table_S3.docx [file Table_S3.docx]

**Supplementary Files**

**Table S3a Primers used in the study.**

| **Target gene** |  | **Human (5′ to 3′)** | **Length (bp)** |
| --- | --- | --- | --- |
| **DHCR7** | Forward | TGATTGACTTCTTCTGGAACGA | 22 |
|  | Reverse | TCATCTGCAGCGTGTAAAGATA | 22 |
| **GAPDH** | Forward | ATCCCATCACCATCTTCCAGGAG | 23 |
|  | Reverse | CCTGCTTCACCACCTTCTTGATG | 23 |

**Table S3b siRNAs used in the study.**

| **Gene** | **Sequences** |
| --- | --- |
| **Si-1（5’ to 3’）** | GCAACCCAACATTCCCAAAGC |
| **Si-1（5’ to 3’）** | GCGCCAACATCCTTGGCTATG |
| **Si-3（5’ to 3’）** | GGAAGTGGTTTGACTTCAAGC |
| **Si-4（5‘to 3’）** | GGAAGTGGTTTGACTTCAAGC |
| **Si-NC( 5‘to 3’）** | GTTCTCCGAACGTGTCACGT |
