# Supplementary material for: DHCR7: from sterol biosynthesis to oncogenic role in colorectal cancer
Source: PeerJ journal article supplement (doi:10.7717/peerj.20323), 2025-11-20
Supplement: Table_S4.docx [file Table_S4.docx]

**Supplemental Files**

**Table S4.**

| Parameter | Normal Range |
| --- | --- |
| Temperature | 20~26°C |
| Relative Humidity | 40%~70% |
| Ammonia Concentration | ≤14 mg/m³ |
| Light Cycle | 12:12 (12 hours light, 12 hours dark) |
| Light Intensity | 15-20 lux |
| Noise Level | ≤60 dB |

**Environmental Monitoring Indicators for Laboratory Animal Management**
